# Supplementary material for: Terrestrial mammal responses to oil palm dominated landscapes in Colombia
Source: PubMed Central journal article supplement (PMC5968401; doi:10.1371/journal.pone.0197539), 2018-05-24
Supplement: pone.0197539.s001.pdf [file pone.0197539.s001.pdf]

# Terrestrial mammal responses to oil palm dominated landscapes in Colombia

## Supporting information

**S1 Fig. Images of the study area in the Llanos region of Colombia (Meta department). a)** Aerial photographs (August 2014) of the landscape highlighting riparian forest and oil palm plantations structure. **b)** Differences in management schemes of understory vegetation in oil palm plantations in Llanos, Colombia. Photo credit:L.E.Pardo.

**a)**

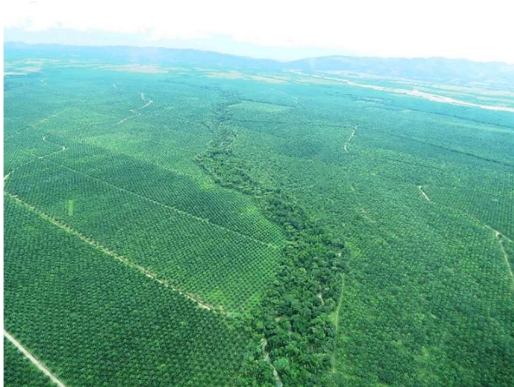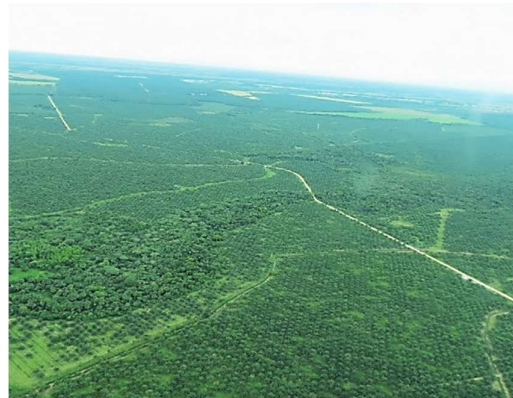

**b)**

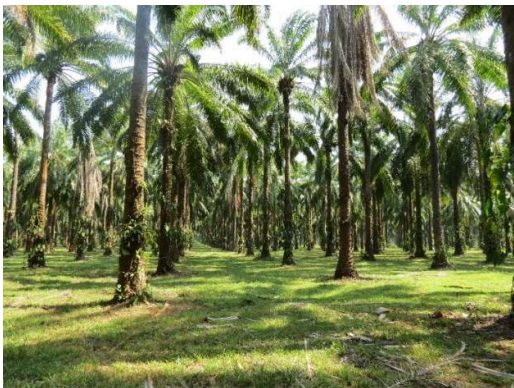

Clean to low understory vegetation

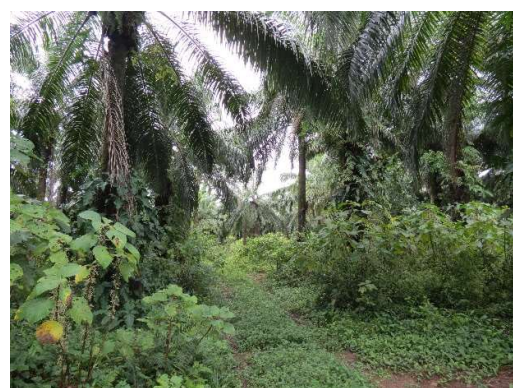

Medium to high understory vegetation
